# Supplementary material for: Clinical Usefulness of Anthropometric Indices to Predict the Presence of Prediabetes. Data from the ILERVAS Cohort
Source: PubMed Central journal article supplement (PMC8003825; doi:10.3390/nu13031002), 2021-03-19
Supplement: nutrients-13-01002-s001.pdf [file nutrients-13-01002-s001.pdf]

**Supplementary Table 1.** Results of the anthropometric indices in the entire population according to the presence of prediabetes.

|                           | Control group<br>(n=5,457) | Prediabetes<br>(n=2,731) | p-value |
|---------------------------|----------------------------|--------------------------|---------|
| Total adiposity           |                            |                          |         |
| BMI (Kg/m <sup>2</sup> )  | 27.8 [24.9-31.0]           | 29.7 [26.7-33.2]         | <0.001  |
| CUN-BAE (%)               | 34.7 [29.1-41.1]           | 39.0 [32.4-44.7]         | <0.001  |
| Deurenberg (%)            | 35.2 [29.7-41.6]           | 39.5 [33.1-45.6]         | <0.001  |
| Visceral adipose tissue   |                            |                          |         |
| WC (cm)                   | 99 [92-106]                | 103 [96-111]             | <0.001  |
| Conicity index            | 1.34 [1.30-1.39]           | 1.36 [1.31-1.41]         | <0.001  |
| WHR                       | 0.60 [0.56-0.65]           | 0.63 [0.59-0.69]         | <0.001  |
| Bonora (cm <sup>2</sup> ) | 183 [145-221]              | 203 [169-245]            | <0.001  |
| A body shape index        | 0.08 [0.08-0.09]           | 0.08 [0.08-0.09]         | 0.061   |
| Body roundness index      | 5.37 [4.41-6.51]           | 6.07 [5.11-7.41]         | <0.001  |
| Neck circumference (cm)   | 38.0 [34.5-40.5]           | 38.0 [35.0-41.0]         | <0.001  |

Data are expressed as a median [interquartile range]. BMI: body mass index; WC: waist circumference; WHR: waist to height ratio; CUN-BAE: Clínica Universidad de Navarra - Body Adiposity Estimator.

**Supplementary Table 2.** Receiver Operating Characteristic curves and appropriate cutoff of anthropometric indices for predicting prediabetes in the entire population.

|                                | Cutoff | Sensitivity | Specificity | AUROC | 95% CI       | p-value |
|--------------------------------|--------|-------------|-------------|-------|--------------|---------|
| <b>BMI (Kg/m<sup>2</sup>)</b>  | 28.7   | 0.59        | 0.57        | 0.61  | 0.59 to 0.62 | <0.001  |
| <b>CUN-BAE (%)</b>             | 34.7   | 0.67        | 0.49        | 0.61  | 0.60 to 0.63 | <0.001  |
| <b>Deurenberg (%)</b>          | 31.5   | 0.57        | 0.42        | 0.63  | 0.61 to 0.65 | <0.001  |
| <b>WC (cm)</b>                 | 102    | 0.55        | 0.60        | 0.60  | 0.59 to 0.61 | <0.001  |
| <b>Conicity index</b>          | 1.33   | 0.68        | 0.42        | 0.57  | 0.56 to 0.58 | <0.001  |
| <b>WHR</b>                     | 0.59   | 0.72        | 0.47        | 0.63  | 0.62 to 0.64 | <0.001  |
| <b>Bonora (cm<sup>2</sup>)</b> | 186    | 0.63        | 0.45        | 0.61  | 0.60 to 0.63 | <0.001  |
| <b>Body roundness index</b>    | 5.28   | 0.71        | 0.48        | 0.63  | 0.62 to 0.64 | <0.001  |
| <b>A body shape index</b>      | 0.08   | 0.43        | 0.59        | 0.51  | 0.49 to 0.52 | 0.147   |
| <b>Neck circumference (cm)</b> | 34.8   | 0.79        | 0.26        | 0.54  | 0.52 to 0.55 | <0.001  |

AUROC: area under the receiver operating characteristic; BMI: body mass index; WC: waist circumference; WHR: waist to height ratio; CUN-BAE: Clínica Universidad de Navarra-Body Adiposity Estimator.
